# Supplementary material for: Electric field imaging of single atoms
Source: PubMed Central journal article supplement (PMC5459997; doi:10.1038/ncomms15631), 2017-05-30
Supplement: ncomms15631-s3.pdf [file ncomms15631-s3.pdf]

*Editorial Note: this manuscript has been previously reviewed at another journal that is not operating a transparent peer review scheme. This document only contains reviewer comments and rebuttal letters for versions considered at Nature Communications.*

REVIEWERS' COMMENTS:

Reviewer #1 (Remarks to the Author):

All concerns raised in my report have been addressed in a detailed and convincing way. I suggest publication in Nature Communications.
